# Supplementary material
Source: Springer Nature journal article supplement (https://www.springermedizin.de/resource/supplementary/12885_2011_2900_MOESM4_ESM.pdf/9462250)

**A**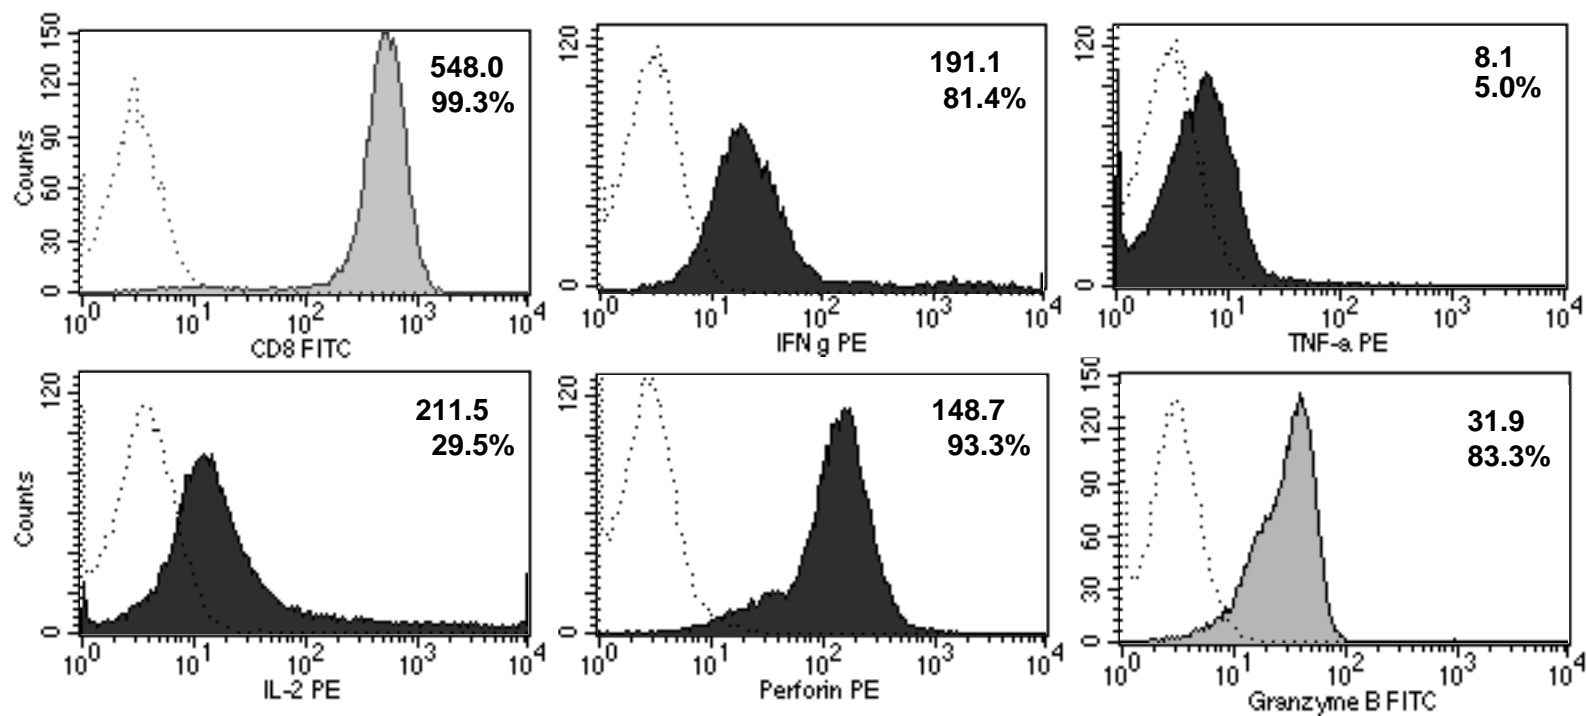**B**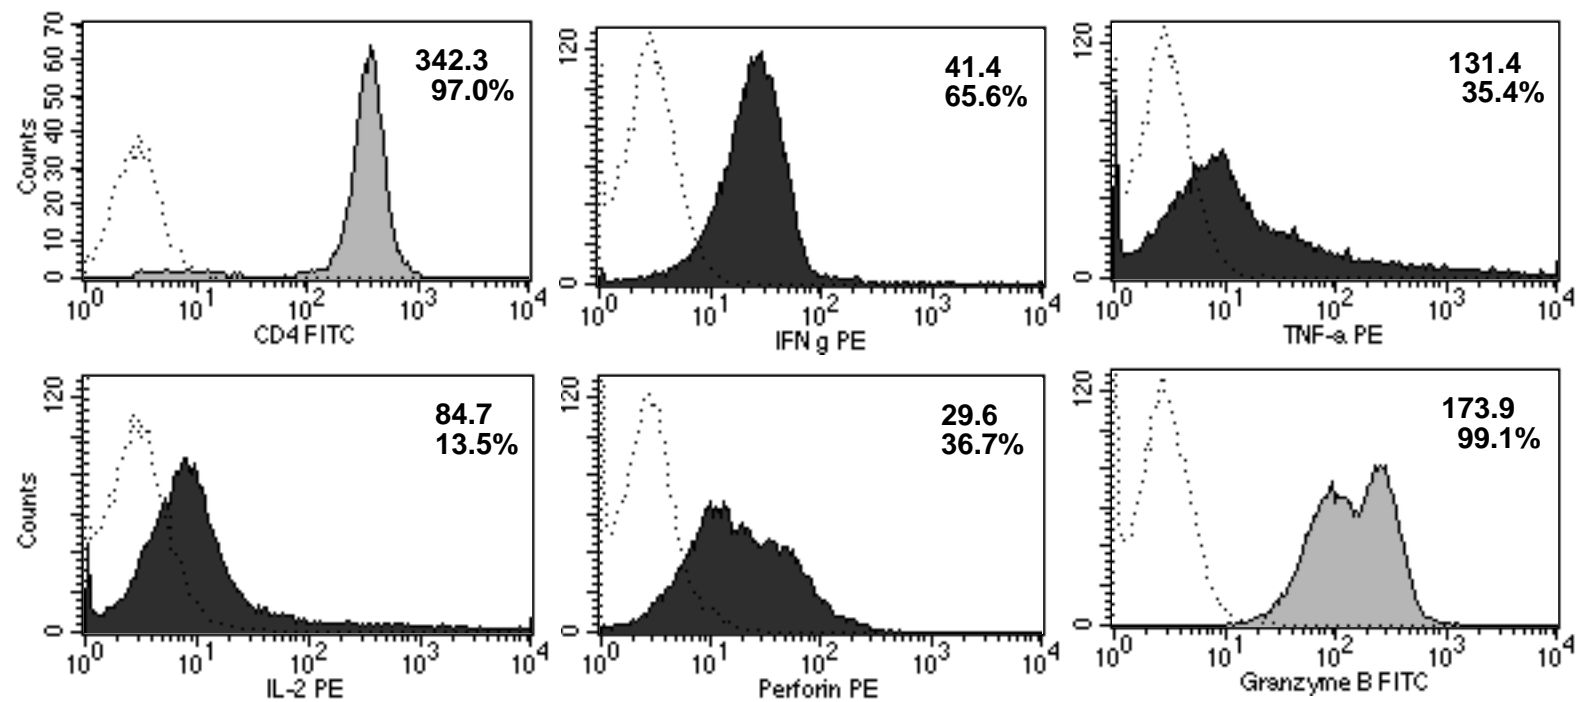

Supplement: MOESM4 [file 9462250]
